# Supplementary material
Source: MDPI journal article supplement (https://www.mdpi.com/2073-4344/9/8/682)
Supplement: s1 [file s1]

# Supplementary Materials: Insights into the Pyrolysis Processes of Ce-MOFs for Preparing Highly Active Catalysts of Toluene Combustion

Wenjie Sun, Xiaomin Li, Chao Sun, Zhen Huang, Hualong Xu, Wei Shen\*

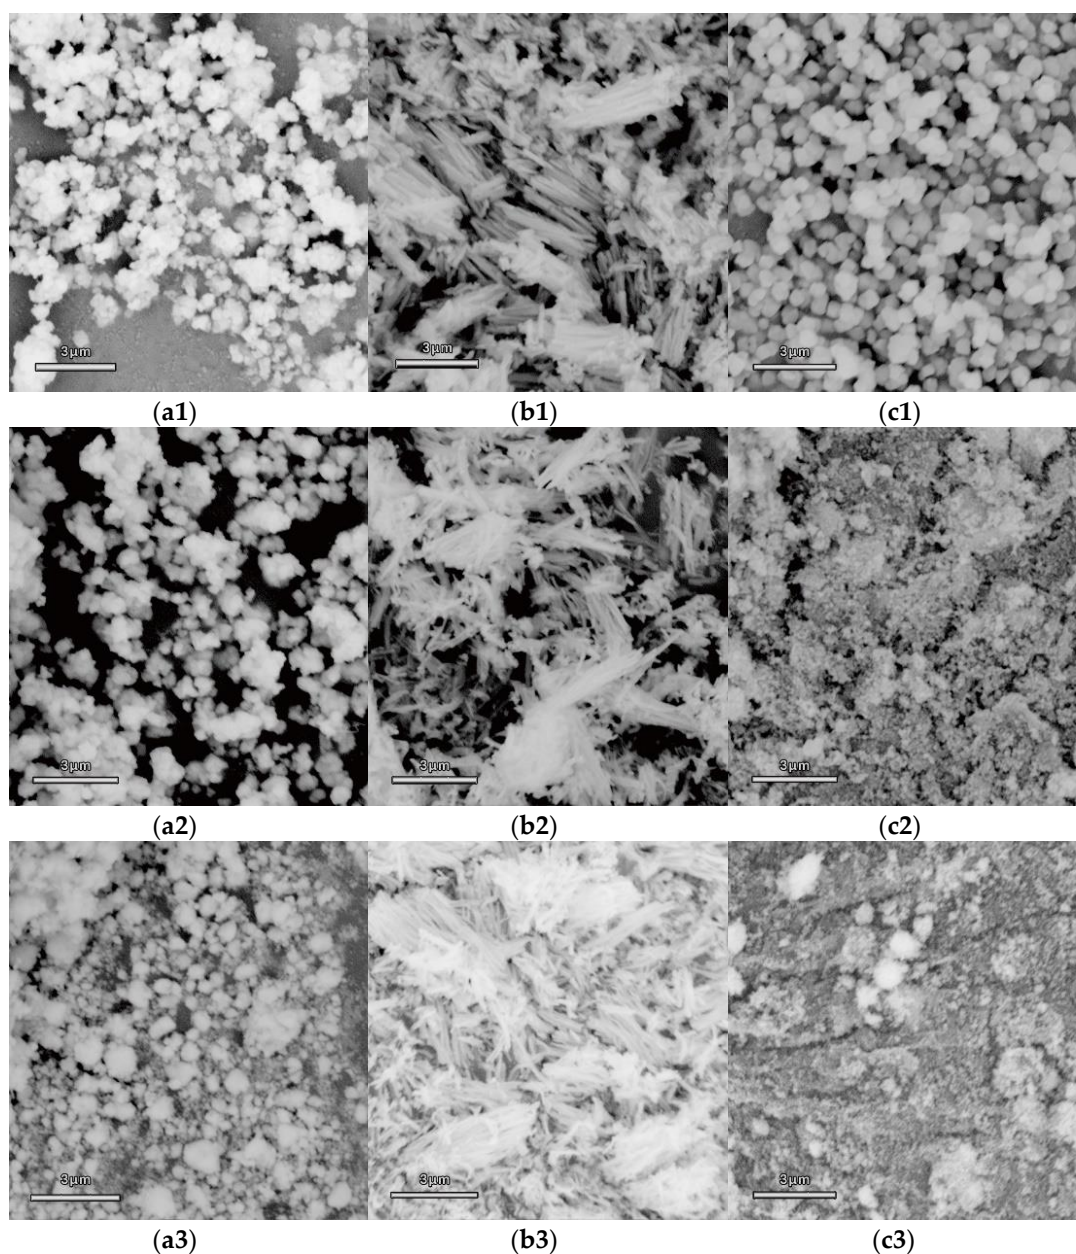

**Figure S1.** SEM images of Ce-MOF-808, Ce-BTC and Ce-UiO-66 before calcination (a1, b1, c1), Ce-MOF-808-250, Ce-BTC-340 and Ce-UiO-66-320 after calcination at 250 °C, 340 °C and 320 °C respectively (a2, b2, c2) and the corresponding CeO<sub>2</sub>-MOFs finally after calcination at 500 °C (a3, b3, c3).
